# Supplementary material for: Why our rainfall-runoff models keep underestimating the peak flows?
Source: Copernicus journal article supplement (doi:10.5194/hess-2022-281), 2022-08-05
Supplement: Supplementary file [file hess-2022-281-AC3-supplement.pdf]

Thank you for the your comments. Given your minor remarks, we accommodated almost every one. Following are our responses in detail. In **black** are your comments and in **red** are ours.

1. *The manuscript proposes a virtual experiment for supporting the hypothesis that interpolating the precipitations determines a peak discharge underestimation.*

5 *The topic is more than interesting and the manuscript, in general, is well written and pleasant to read. While the discussion (outstanding) raised by the other reviewer and author is stimulating and full of hydrological truths, I am in favor of the submitted manuscript.*

10 *Indeed, I am in favor to provide practical analyses for supporting theoretical hypotheses. Of course and above all in case of virtual experiments, it is difficult to reach general conclusions since the obtained results are constrained by the chosen models.*

*In the present case the proposed analysis has an interesting and clear message well supported by the provided results so I am glad to suggest its publication with minor revision.*

15 **We are grateful to you for seeing this as an interesting study and that your are in favor of submission. Of course, we have limitations here that we do not dispute. However, the problem of consistent underestimation (as shown by resampling observed time series with smaller density) is a fact regardless of the chosen rainfall-runoff model.**

#### **Comments**

2. *Section 3.1, 3.2, and 3.3 should be enriched with some plots schematizing the proposed analyses. The language is fluent and understandable, however, the reader could be lost.*

20 **We have added some more explanations to these sections. We would very much like to add more figures, but unfortunately we are on a limited budget here (even the present paper length goes over it).**

3. *Section 3.4. It should be specified the role of temperature and evapotranspiration. Reading the following Sections it will be clear, however it is better to clarify that such information are useful for the rainfall runoff model.*

**More explanation on the role of temperature and evapotranspiration is added.**

4. *Section 6. Conclusion should be structured answering to the four questions posed in the Introduction and it should be stressed that they are limited to the virtual experiment condition and model adopted.*

25 **Thank you for pointing this out. We have rewritten the answers accordingly.**
